# Supplementary material for: Pan genome of the phytoplankton Emiliania underpins its global distribution
Source: Springer Nature journal article supplement (doi:10.1038/nature12221), 2013-06-11
Supplement: 41586_2013_BFnature12221_MOESM267_ESM.pdf [file 41586_2013_BFnature12221_MOESM267_ESM.pdf]

# SUPPLEMENTARY INFORMATION

doi:10.1038/nature12221

**a**

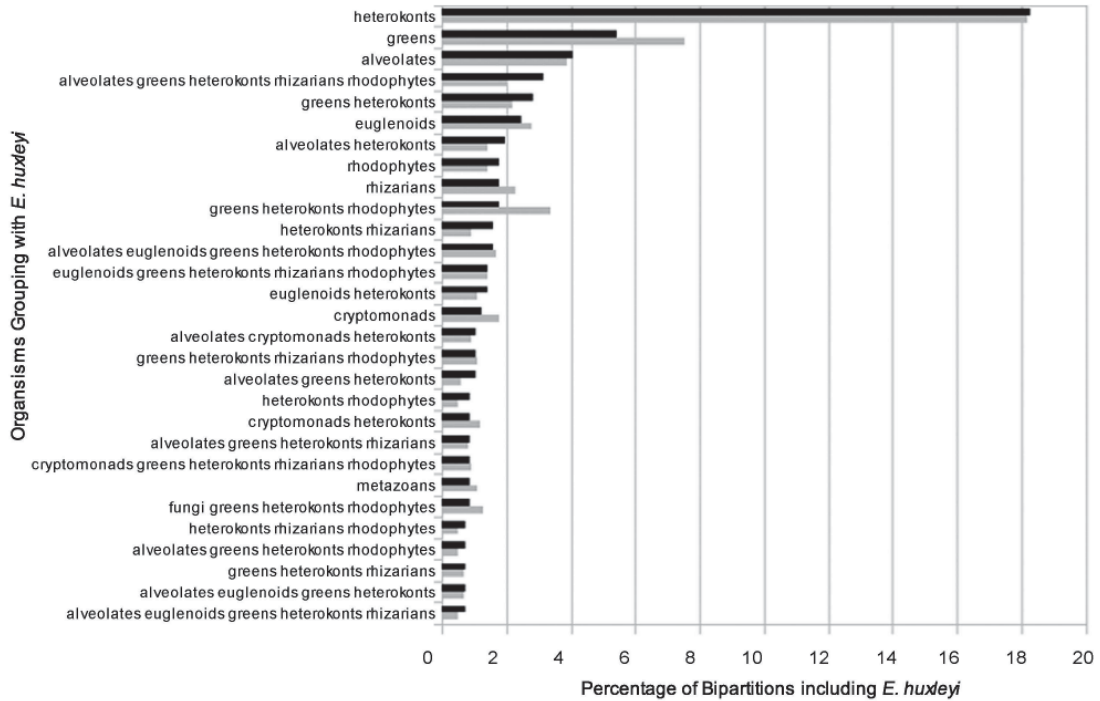

**b**

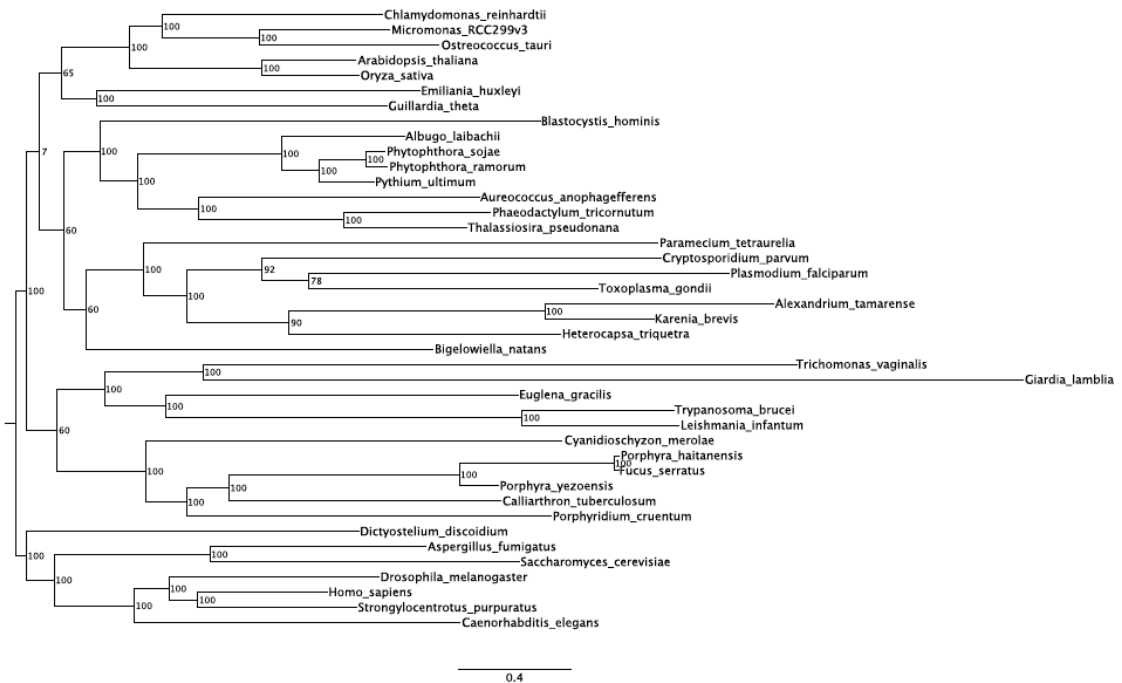

c

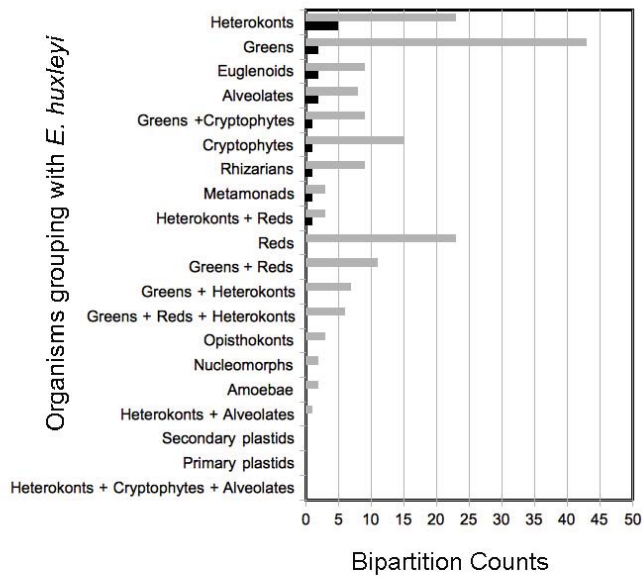

**Supplementary Figure 1| Phylogenomic analysis using single gene trees and a concatenated phylogeny.** **a)** Counts of otherwise monophyletic bipartitions containing *E. huxleyi* from 1563 single protein trees. Black bars represent counts from only those trees in which the branch leading to *E. huxleyi* and its sister taxon is represented by a bootstrap value of 70 or above. Grey bars represent counts from all trees. **b)** Concatenated phylogeny of 228 *E. huxleyi* genes showing the best RAXML topology with support values from 100 bootstrap replicates. Note the poorly resolved placement of the *E. huxleyi*+*Guillardia theta* clade with respect to the other plastid-containing lineages. **c)** Counts of otherwise monophyletic bipartitions containing *E. huxleyi* from single protein trees corresponding to the alignments used in the concatenated tree. Black bars represent counts from only those trees in which the branch leading to *E. huxleyi* and its sister taxon is represented by a bootstrap value of 70 or above. Grey bars represent counts from all trees.

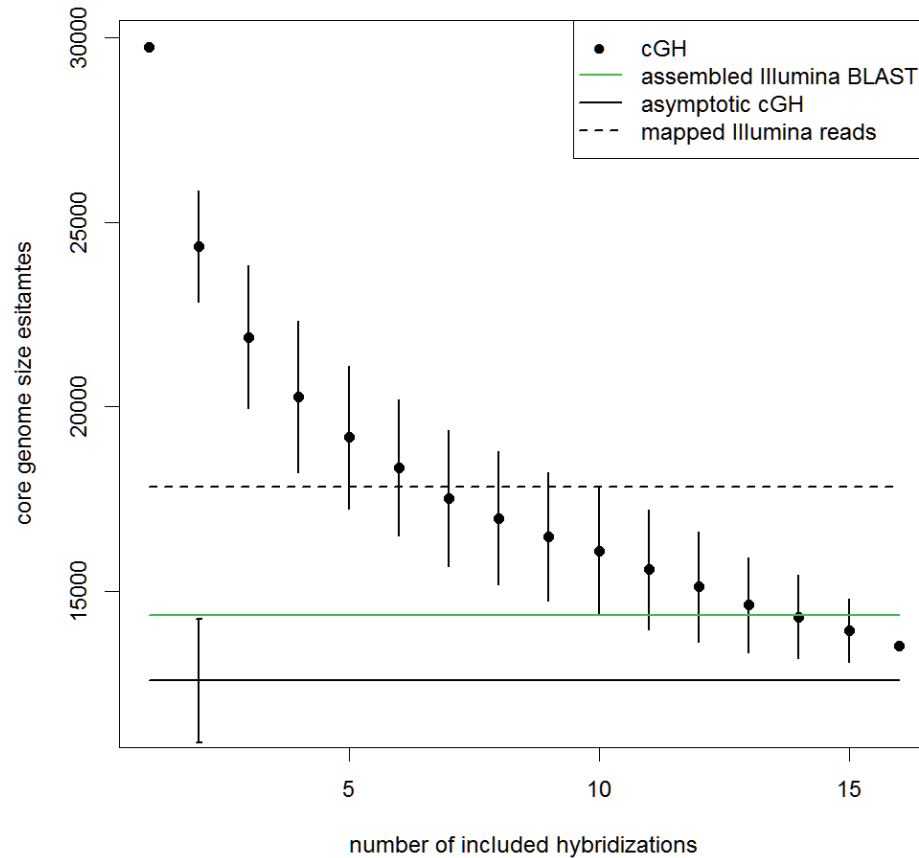

**Supplementary Figure 2** | Asymptotic analysis of the core genome size estimates obtained from comparative genomic hybridization (cGH). The core-genome size from cGH is 12,757  $\pm$  1,673 genes. From an exponential fit the estimated asymptotic size is ~13,000 (horizontal black line). The unassembled Illumina comparative approach yielded a core-genome of 17,826 genes (dotted black line) while the assembled reads yielded a core of 14,344 genes (green), see text. Vertical bars indicate  $\pm$  one standard deviation from 200 random re-samples. The asymptotic estimate is the average from repeated non-linear exponential fits under 500 random permutations of the order of hybridization data and dropping estimates lower than 8,000.

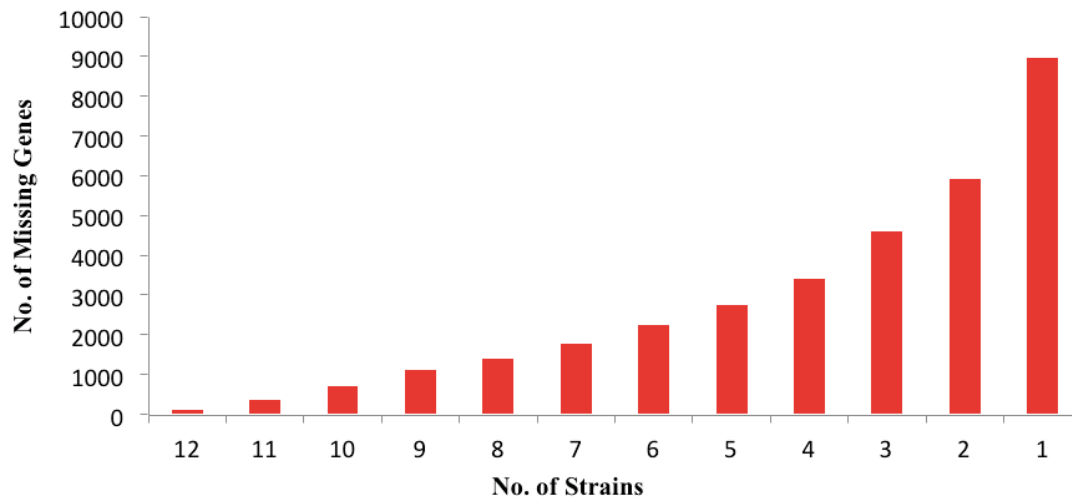

**Supplementary Figure 3** | The cumulative number of genes in the reference genome not detected in the indicated number of strains (~9000 variable genes are not detected in at least one strain, but all of these genes are detected in the genetic repository of all strains). Illumina reads generated from genomic DNA extracted from 13 different strains, including AWI1516, were mapped to the refined gene model set assembled from the reference genome. Genes were detected using a threshold value equivalent to the coverage of ~50% of the gene length), whereby genes with < 50% coverage with mapped reads were regarded as missing. The total number of missing genes is represented on the Y-axis and the number of strains is indicated along the X-axis.

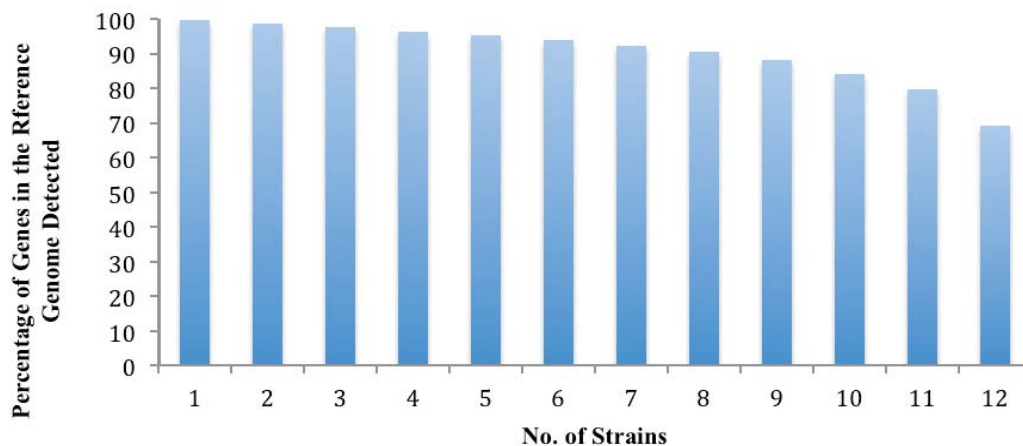

**Supplementary Figure 4** | The percentage of reference genes detected across multiple strains of *E. huxleyi*. Illumina reads generated from genomic DNA extracted from 13 different strains, including AWI1516, were mapped to the reduced gene model set assembled from the reference genome. Genes with  $\geq 50\%$  coverage based on mapped reads were called present, and the total number of genes found in each strain was then compared to the 30,569 predicted gene models in the reference genome.

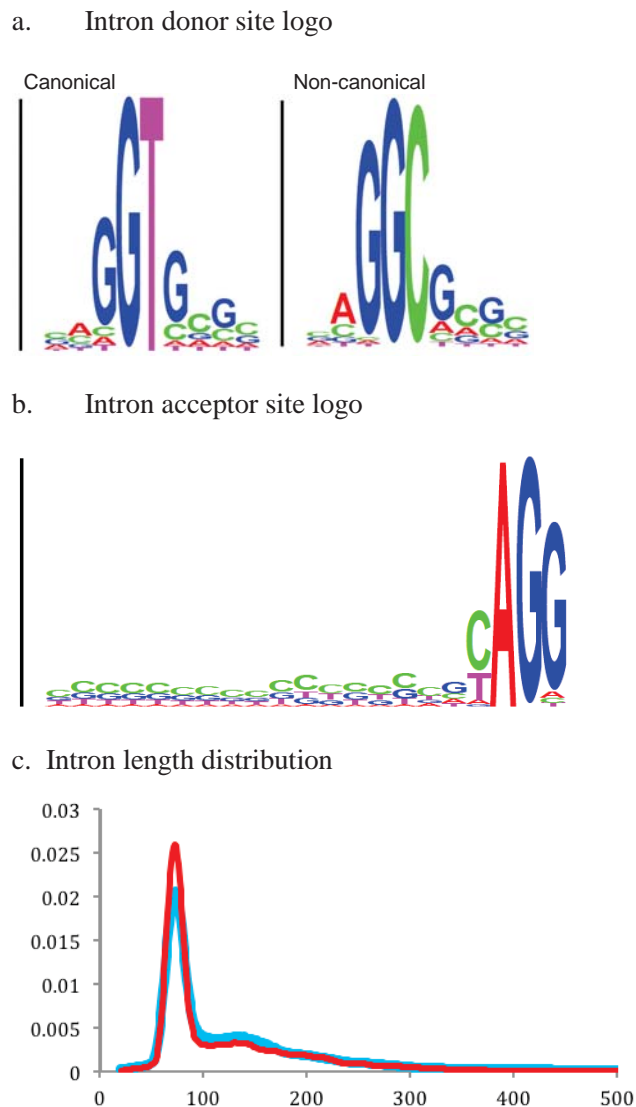

**Supplementary Figure 5** | Logo images of intron donor and acceptor sites. **a**, The sequence logo for the *E. huxleyi* canonical and non-canonical donor sites in the data set with the most frequent nucleotides being CAGGT|GCGC and CAGGC|GCGC. **b**, The sequence logo for the acceptor sites in the *E. huxleyi* data set with the most frequent nucleotides being GT|GC|AGG. **c**, Intron length distribution where GC donor introns are shown in red and the GC acceptor introns are in blue. The vertical axis shows the percentage of introns and the horizontal axis, the base pair length of the introns.

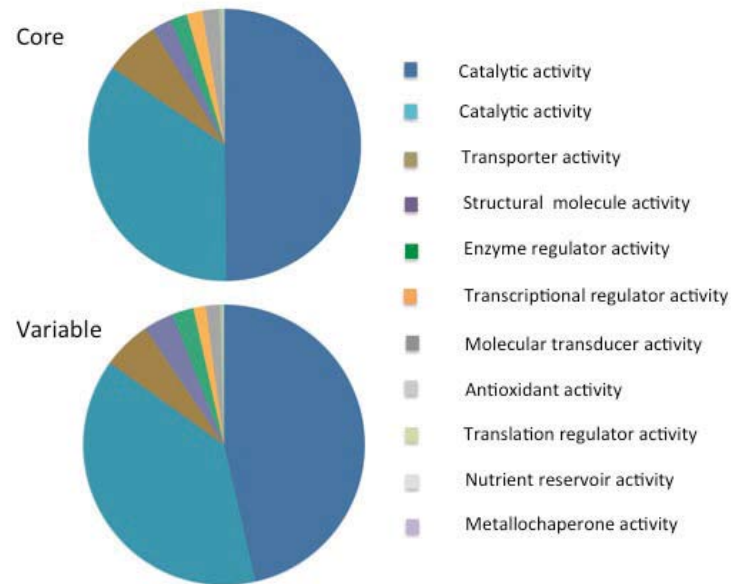

**Supplementary Figure 6** | Pie charts of the function categories of genes in the pan genome (core and variable sets based on the reference strain CCMP 1516). Colors are coded according to the insert legend, with percentages given in parentheses for the core versus variable genomes. Note that the major difference is the percentage of unknown/orphan genes.

**Supplementary Table 1 | *Emiliana huxleyi* CCMP 1516 reference genome assembly statistics.**

| <b>General assembly</b>                                     |               |
|-------------------------------------------------------------|---------------|
| Total number of reads                                       | 2991780       |
| Genome size (Mb)                                            | 141.7         |
| Read depth coverage (fold)                                  | 10            |
| Scaffold sequence gap (%)                                   | 6.98          |
| Scaffold number                                             | 6995          |
| Scaffold N50/L50                                            | 109/404.8 Kb  |
| Contig number                                               | 26075         |
| Contig N50/L50                                              | 1315/29.7 Kb  |
| <b>Average Properties</b>                                   |               |
| Gene length (bp)                                            | 1718          |
| Transcript length (bp)                                      | 1129          |
| Protein length (aa)                                         | 346           |
| Exon frequency number per gene                              | 3.65          |
| Exon length (bp)                                            | 308           |
| Intron length (bp)                                          | 242           |
| Gene density per Mbp                                        | 233           |
| <b>Estimating genome completeness:</b>                      |               |
| Conserved eukaryotic single copy genes <sup>a</sup>         | 97%           |
| Core eukaryotic genes mapping approach (CEGMA) <sup>b</sup> | 97%           |
| <b>Genes were validated by the following evidence:</b>      |               |
| Total number of gene models                                 | 30,569 (100%) |
| Start + stop codons                                         | 25,315 (83%)  |
| EST support (# of genes / %)                                | 15,642 (51%)  |
| RNASeq (# of genes / %)                                     | 29,637 (96%)  |
| Tiling array (# of genes / %)                               | 23,911 (72%)  |
| NR hit (# of genes / %)                                     | 21,143 (69%)  |
| SwissProt hit (# of genes / %)                              | 19,722 (65%)  |
| Pfam hit (# of genes / %)                                   | 10496 (34%)   |

<sup>a</sup>Based on the 716 highly conserved single-copy eukaryotic genes detailed in the *Daphnia pulex* genome paper.

<sup>b</sup>Based on the 458 highly conserved single-copy eukaryotic genes from the CEMGA set.

**Supplementary Table 2 | Genes putatively identified as encoding enzymes involved in the catabolism of DMSP. tBlastn homology searches were performed against the genome using corresponding protein sequences from *Halomonas* sp. HTNK1.**

| Gene Description                      | Gene Name | No. of Orthologs | Protein ID | Allelic Variant | EST      |          | Homolog                     |
|---------------------------------------|-----------|------------------|------------|-----------------|----------|----------|-----------------------------|
|                                       |           |                  |            |                 | evidence | e-value  |                             |
| Choline dehydrogenase                 | DddA      | 6                | 441720     |                 | Y        | 1.32E-42 | <i>Halomonas</i> sp. HTNK1  |
|                                       |           |                  | 249893     |                 | Y        | 2.94E-41 |                             |
|                                       |           |                  | 115992     |                 | Y        | 3.29E-35 |                             |
|                                       |           |                  | 467417     | 463443          | Y        | 1.18E-34 |                             |
|                                       |           |                  | 419045     | 426209          | Y        | 5.53E-25 |                             |
|                                       |           |                  | 108462     |                 | Y        | 4.89E-10 |                             |
| DMSP lyase                            | DddD      | 2                | 558015     |                 | Y        | 1.56E-63 | <i>Halomonas</i> sp. HTNK1  |
|                                       |           |                  | 558016     |                 | Y        | 2.75E-55 |                             |
| Enoyl-CoA hydratase                   | AcuK      | 5                | 436143     |                 | Y        | 1.51E-31 | <i>Halomonas</i> sp. HTNK1  |
|                                       |           |                  | 355649     |                 | Y        | 1.51E-31 |                             |
|                                       |           |                  | 367461     | 360949          | Y        | 8.00E-12 |                             |
|                                       |           |                  | 558212     |                 | N        | 1.80E-09 |                             |
|                                       |           |                  | 440242     |                 | Y        | 6.28E-08 |                             |
| Iron containing alcohol dehydrogenase | DddB      | 2                | 437150     | 357847          | Y        | 1.79E-89 | <i>Pseudomonas</i> sp. J465 |
|                                       |           |                  | 451417     | 244398          | Y        | 9.28E-25 |                             |
| Aldehyde dehydrogenase                | DddC      | 4                | 445304     | 434256          | Y        | 2.10E-25 | <i>Halomonas</i> sp. HTNK1  |
|                                       |           |                  | 358314     |                 | Y        | 3.97E-24 |                             |
|                                       |           |                  | 558209     |                 | Y        | 1.16E-20 |                             |





Supplementary Table 3 | Proteins involved in sphingolipid and omega-3- polyunsaturated fatty acid synthesis.

| Protein Description                                           | Functionally Characterized | No. of Paralogs | Protein ID       | Core vs. Variable Genome |
|---------------------------------------------------------------|----------------------------|-----------------|------------------|--------------------------|
| <b>Genes involved in sphingolipid synthesis</b>               |                            |                 |                  |                          |
| Serine Palmitoyl Transferase (SPT)                            | yes                        | 1               | 432901           | core                     |
| Ketosphinganine reductase                                     | no                         | 2               | 437991<br>434961 | core<br>core             |
| Ceramide synthase (LAG1)                                      | yes                        | 1               | 200862           | nd                       |
| Ceramide glucosyltransferase                                  | no                         | 1               | 436316           | core                     |
| Sphingolipid LCB $\Delta$ 4-desaturase                        | yes                        | 1               | 461341           | core                     |
| Sphingolipid LCB $\Delta$ 8-desaturase                        | yes                        | 1               | 72565            | core                     |
| Sphingolipid LCB $\Delta$ 9-methyl transferase                | yes                        | 1               | 365614           | core                     |
| <b>Genes involved in the biosynthesis of omega-3 LC-PUFAs</b> |                            |                 |                  |                          |
| $\Delta$ 12-desaturase                                        | no                         | 2               | 432965<br>424263 | nd<br>core               |
| $\Delta$ 15-desaturase                                        | no                         |                 | 468588           | core                     |
| $\Delta$ 6-desaturase                                         | no                         |                 | 417285           | core                     |
| $\Delta$ 9-elongase                                           | no                         | 2               | 433098<br>434059 | core<br>core             |
| $\Delta$ 8-desaturase                                         | no                         |                 | 216445           | core                     |
| $\Delta$ 5-desaturase                                         | no                         |                 | 443389           | core                     |
| $\Delta$ 5-elongase                                           | no                         | 3               | 369636<br>414244 | core<br>core             |
| $\Delta$ 4-desaturase                                         | no                         |                 | 433467           | core                     |

Supplementary Table 4 | Genes encoding proteins potentially involved in biomineralization processes.

| Protein Description                                                                           | Family member/<br>Subfamily/ Complex<br>subunit | Number of<br>Paralogs | Protein ID                                              | Core vs<br>Variable                            |
|-----------------------------------------------------------------------------------------------|-------------------------------------------------|-----------------------|---------------------------------------------------------|------------------------------------------------|
| Proton/calcium exchanger                                                                      | CAX                                             | 7                     | 72273<br>66584<br>416800<br>415715<br>103021<br>223499  | core<br>variable<br>core<br>core<br>core<br>nd |
| Cation/calcium exchanger                                                                      | CCX                                             | 2                     | 203920<br>449053                                        | core<br>core                                   |
| Potassium dependent sodium/calcium exchangers                                                 | NCKX                                            | 2                     | 205210<br>447939                                        | core<br>variable                               |
| Potassium independent sodium/calcium exchangers                                               | NCX                                             | 1                     | 454623                                                  | core                                           |
| Calcium pumps                                                                                 | ECA                                             | 6                     | 522052<br>522053<br>62350<br>426283<br>101130<br>466567 | nd<br>nd<br>core<br>core<br>variable<br>core   |
| Ca <sup>2+</sup> /Mg <sup>2+</sup> -permeable cation channels Transient<br>Receptor Potential | TRP                                             | 4                     | 449985<br>468587<br>455760<br>107737                    | core<br>core<br>core<br>core                   |
| 4 Domain voltage-gated Ca <sup>2+</sup> channels                                              | CAV                                             | 2                     | 448907<br>448526                                        | core<br>core                                   |

|                                                      |       |   |        |          |
|------------------------------------------------------|-------|---|--------|----------|
| IP3R                                                 | VDC   | 2 | 97870  | core     |
|                                                      |       |   | 196523 | nd       |
|                                                      | IPR   | 2 | 209909 | nd       |
|                                                      |       |   | 250663 | variable |
| Eukaryotic Na <sup>+</sup> /H <sup>+</sup> exchanger | NAHI  | 5 | 465194 | core     |
|                                                      |       |   | 434034 | core     |
|                                                      |       |   | 467182 | core     |
|                                                      |       |   | 196090 | core     |
|                                                      |       |   | 464223 | core     |
| Bacterial Na <sup>+</sup> /H <sup>+</sup> exchanger  | NHA   | 5 | 219535 | variable |
|                                                      |       |   | 447659 | core     |
|                                                      |       |   | 105293 | core     |
|                                                      |       |   | 521936 | nd       |
| Voltage gated proton channel<br>V-ATPase             | HVCN  | 1 | 631975 | nd       |
|                                                      | ATPVA | 2 | 464767 | core     |
|                                                      | ATPVA |   | 439538 | core     |
|                                                      | ATPVB | 1 | 435128 | core     |
|                                                      | ATPVC | 3 | 359783 | core     |
|                                                      | ATPVC |   | 451883 | core     |
|                                                      | ATPVC |   | 558234 | nd       |
|                                                      | ATPVD | 2 | 413949 | core     |
|                                                      | ATPVD |   | 420005 | core     |
|                                                      | ATPVE | 1 | 433060 | core     |
|                                                      | ATPVF | 1 | 352209 | core     |

|                                                                                            | ATPVG | 1 | 355949        | core     |
|--------------------------------------------------------------------------------------------|-------|---|---------------|----------|
| P type ATPase (PM H <sup>+</sup> ATPase)                                                   |       | 2 | 67081         | core     |
|                                                                                            |       |   | 76123         | variable |
| H <sup>+</sup> PPase                                                                       |       | 2 | 415047        | core     |
|                                                                                            |       |   | 439740        | core     |
| Putative Ci Transporters                                                                   |       |   |               |          |
| SLC4 Na <sup>+</sup> independent Cl <sup>-</sup> /HCO <sub>3</sub> <sup>-</sup> exchangers | SLC4  | 3 | 436956        | core     |
|                                                                                            |       |   | 450694        | core     |
|                                                                                            |       |   | 466232        | core     |
| AE                                                                                         |       | 3 | 99943         | core     |
|                                                                                            |       |   | 198643        | core     |
|                                                                                            |       |   | 200137        | core     |
| Carbonic anhydrases                                                                        |       |   |               |          |
| Alpha CA                                                                                   |       |   | 62679         | core     |
|                                                                                            |       |   | 456048        | core     |
|                                                                                            |       |   | 558406/437352 | nd       |
| Beta CA                                                                                    |       |   | 469462        | nd       |
|                                                                                            |       |   | 239690        | nd       |
|                                                                                            |       |   | 115240        | variable |
|                                                                                            |       |   | 233823        | variable |
| Delta CA                                                                                   |       |   | 436031        | core     |
|                                                                                            |       |   | 469783        | core     |
|                                                                                            |       |   | 222602        | core     |
|                                                                                            |       |   | 229394        | core     |
|                                                                                            |       |   | 227360        | variable |
|                                                                                            |       |   | 195575        | variable |

|          |        |          |
|----------|--------|----------|
| Gamma CA | 432493 | variable |
|          | 373149 | variable |
|          | 63173  | core     |
|          | 214705 | core     |

---

**Table 5 | A comparison of the sanger sequenced CCMP 1516 reference genome with the CLC assemblies of three other *E. huxleyi* strains deeply sequenced using the Illumina platform.**

| Strain        | Flow Cytometry Haploid Genome Size (Mb) | Genome Assembly Size (Mb) | Illumina Read Depth Coverage | CEGMA % Completeness | Ref Genome Coverage (%) | Non-aligning sequence <sup>a</sup> (Mb) | Strain Specific Sequence <sup>b</sup> (Mb) |
|---------------|-----------------------------------------|---------------------------|------------------------------|----------------------|-------------------------|-----------------------------------------|--------------------------------------------|
| M202 (EH2)    | 120 +/- 0.01                            | 117.7                     | 322                          | 95                   | 44.8                    | 54.9 (47%)                              | 40.7 (35%)                                 |
| M222 (VAN556) | 133 +/- 0.02                            | 109.7                     | 265                          | 95                   | 47.8                    | 42.8 (39%)                              | 21.4 (20%)                                 |
| 92A (CCMP379) | 99 +/- 0.00                             | 85.6                      | 352                          | 95                   | 46.9                    | 19.9 (23%)                              | 8.8 (10%)                                  |

<sup>a</sup>Non-aligning sequence, the amount of assembled non-gapped sequence with blast identity scores to the CCMP 1516 reference genome < 80% over segments > 100 bp; with percentage of the total strain specific assembly specified in parenthesis.

<sup>b</sup>Strain Specific sequence, the amount of assembled non-gapped sequence with blast identity scores to other strains < 80% over segments > 100 bp; with percentage of the total strain specific assembly specified in parenthesis.

<sup>c</sup>Missing genes are defined as genes with <50% length coverage by mapped reads.

Supplementary Table 6 | Characteristics of *E. huxleyi* strains used for Illumina sequencing.

| Strain                    | Location                                 | Length in Culture | Flow                       |                 | % Ref Genome Covered <sup>b</sup> | %Unmapped Reads | Missing Genes <sup>c</sup> | SNPs    |
|---------------------------|------------------------------------------|-------------------|----------------------------|-----------------|-----------------------------------|-----------------|----------------------------|---------|
|                           |                                          |                   | Cytometry Genome Size (Mb) | Genome Coverage |                                   |                 |                            |         |
| <b>AW1516<sup>a</sup></b> | South Pacific (02.6667S 82.7167W)        | 1991              | 137 +/- 0.05               | 14              | 91.31                             | 6.8             | 598                        | 62,889  |
| <b>92D</b>                | English Channel (50,02N 04,22W)          | 1975              | 106 +/- 0.02               | 19              | 68.02                             | 30.4            | 4953                       | 187,925 |
| <b>92E</b>                | English Channel (49, 52N 6,12W)          | 1992              | 100 +/- 0.07               | 19              | 77.85                             | 26.1            | 2366                       | 175,800 |
| <b>92F</b>                | English Channel (49,52N 6,12W)           | 1992              | nd                         | nd              | 68.00                             | 30.8            | 4832                       | 184,053 |
| <b>B11</b>                | Bergen Sea (60, 16N 5,14E)               | 1992              | 168 +/- 0.08               | 14              | 77.52                             | 30.2            | 2268                       | 133,854 |
| <b>B39</b>                | Bergen Sea (60° 25' 58" N, 5° 38' 13" E) | 1992              | 136 +/- 0.00               | 17              | 76.51                             | 29.3            | 2426                       | 138,100 |
| <b>L</b>                  | Oslo fjord (60°N 11°E)                   | 1959/68/80        | nd                         | nd              | 78.21                             | 25.3            | 2296                       | 145,623 |
| <b>M217</b>               | Bergen Sea (60,16N 5,14E)                | 1992              | 152 +/- 0.08               | 16              | 91.98                             | 17.5            | 238                        | 46,897  |
| <b>12_1 (CCMP 371)</b>    | Sargasso Sea (32N 62W)                   | 1987              | nd                         | nd              | 82.64                             | 24.2            | 1454                       | 144,487 |
| <b>M219 (NZEH)</b>        | Big Glory Bay, New Zealand               | 1992              | 154 +/- 0.03               | 29              | 77.12                             | 37.7            | 2061                       | 123,536 |
| <b>M202 (EH2)</b>         | Gt. Barrier Reef, Australia              | 1990              | 120 +/- 0.01               | 322             | 76.79                             | 22.5            | 3119                       | 132,166 |
| <b>92A</b>                | English Channel                          | 1957              | 99 +/- 0.00                | 352             | 74.66                             | 29.5            | 3348                       | 155,785 |
| <b>M222 (VAN556)</b>      | Vancouver, BC (49,5N 144,40W)            | 1984              | 133 +/- 0.02               | 265             | 70.19                             | 32.9            | 3929                       | 204,852 |

<sup>a</sup>AW1516<sup>a</sup> was nominally considered CCMP1516 but maintained at the Alfred Wegener Institute and is not the CCMP culture collection strain used for JGI Sanger sequencing.

<sup>b</sup>Coverage was estimated by direct mapping of reads to the reference genome using the Mapping and Assembly with Quality software package.

<sup>c</sup>Missing genes are operationally defined as genes with less than 50% of their length covered by mapped reads.



Supplementary Table 7 | Assembly statistics of genomic reads from 12 different *E. huxleyi* strains using the CLC Genomics Workbench.

| Strain                | Total Reads | Total bp       | % GC | N <sup>a</sup> | n:N50 <sup>b</sup> | N50 <sup>c</sup> (bp) | Max <sup>d</sup> (bp) | Assembly Size (Mb) | Completeness CEGMA (%) <sup>e</sup> |
|-----------------------|-------------|----------------|------|----------------|--------------------|-----------------------|-----------------------|--------------------|-------------------------------------|
| <b>AW11516</b>        | 25,260,678  | 191,981,528    | 65.1 | 80774          | 15305              | 878                   | 84510                 | 49.1               | 95.0                                |
| <b>92D</b>            | 26,153,077  | 1,987,633,852  | 64.3 | 89837          | 17878              | 759                   | 18908                 | 52.8               | 91.7                                |
| <b>92E</b>            | 27,029,626  | 2,054,251,576  | 64.9 | 87542          | 15706              | 1018                  | 47013                 | 59.4               | 94.5                                |
| <b>92F</b>            | 26,501,216  | 2,676,622,816  | 64.2 | 95147          | 18511              | 821                   | 44419                 | 59                 | 91.0                                |
| <b>B11</b>            | 23,074,156  | 2,330,489,756  | 64.4 | 132288         | 26692              | 695                   | 21343                 | 75.1               | 93.9                                |
| <b>B39</b>            | 22,759,741  | 2,298,733,841  | 64.4 | 112729         | 19512              | 938                   | 27923                 | 73.2               | 94.1                                |
| <b>L</b>              | 22,905,701  | 1,740,833,276  | 64.8 | 87386          | 15697              | 939                   | 37123                 | 54.2               | 93.9                                |
| <b>M217</b>           | 24,012,306  | 2,425,242,906  | 62.8 | 117904         | 20463              | 938                   | 208111                | 76.5               | 95.2                                |
| <b>12-1 (CCMP371)</b> | 26,604,262  | 2,021,923,912  | 64.8 | 94172          | 17490              | 837                   | 84508                 | 56.4               | 95.0                                |
| <b>M219 (NZEH)</b>    | 50,355,481  | 4,462,328,406  | 61.5 | 143724         | 29874              | 645                   | 29910                 | 101.3              | 95.0                                |
| <b>M202 (EH2)</b>     | 386,571,098 | 38,657,109,800 | 61.2 | 77783          | 5129               | 3378                  | 2043190               | 117.7              | 94.5                                |
| <b>92A</b>            | 344,534,050 | 34,453,405,000 | 62.2 | 56794          | 8753               | 2620                  | 84520                 | 85.6               | 94.8                                |
| <b>M222 (Van556)</b>  | 352,924,546 | 35,292,454,600 | 62.4 | 75716          | 9927               | 2665                  | 183618                | 109.7              | 95.0                                |

<sup>a</sup> total number of contigs<sup>b</sup> contig number of the median contig length<sup>c</sup> median contig length<sup>d</sup> maximum contig length<sup>e</sup> percent completeness based on conserved eukaryote genes mapping approach based on criteria using an alignment coverage >50% of the gene length

Supplementary Table 8 | *E. huxleyi* genes likely transferred from bacteria or viruses.

| Protein ID | Gene Description                                                                   | Bacterial/Viral homologs                                                                                                                         | e-value   |
|------------|------------------------------------------------------------------------------------|--------------------------------------------------------------------------------------------------------------------------------------------------|-----------|
| 57193      | HisI Phosphoribosyl-AMP cyclohydrolase                                             | Verrucomicrobia ( <i>Coraliomargarita akajimensis</i> )                                                                                          | 8.00E-32  |
| 61543      | TrxB Thioredoxin reductase                                                         | Cyanobacteria ( <i>Synechococcus</i> sp.,<br><i>Prochlorococcus marinus</i> )                                                                    | 2.00E-101 |
| 63173      | Paa Y Carbonic anhydrases/acetyltransferases, isoleucine patch superfamily         | Verrucomicrobia ( <i>Coraliomargarita akajimensis</i> ,<br><i>Akkermansia muciniphila</i> )                                                      | 9.00E-45  |
| 66010      | Uncharacterized conserved protein                                                  | Cyanobacteria ( <i>Synechococcus</i> sp.,<br><i>Prochlorococcus marinus</i> )                                                                    | 6.00E-137 |
| 99196      | CaiD Enoyl-CoA hydratase/carnithine racemase                                       | Actinobacteria ( <i>Frankia</i> sp., <i>Acidimicrobium ferrooxidans</i> )                                                                        | 5.00E-28  |
| 113427     | DdpA ABC-type dipeptide transport system, periplasmic component                    | Fusobacteria ( <i>Fusobacterium nucleatum</i> )                                                                                                  | 2.00E-57  |
| 116424     | HisC Histidinol-phosphate/aromatic aminotransferase and cobyric acid decarboxylase | Gammaproteobacteria ( <i>Saccharophagus degradans</i> )                                                                                          | 4.00E-34  |
| 118625     | DraG ADP-ribosylglycohydrolase                                                     | Epsilonproteobacteria ( <i>Arcobacter nitrofigilis</i> )                                                                                         | 2.00E-104 |
| 195029     | RacX Aspartate racemase                                                            | Betaproteobacteria ( <i>Burkholderia cepacia</i> ,<br><i>Burkholderia ambifaria</i> )                                                            | 6.00E-15  |
| 199862     | unknown                                                                            | Betaproteobacteria ( <i>Bordetella avium</i> , <i>Bordetella bronchiseptica</i> , <i>Bordetella petrii</i> , <i>Achromobacter xylosoxidans</i> ) | 4.00E-28  |
| 205111     | AslA Arylsulfatase A and related enzymes                                           | Verrucomicrobia ( <i>Coraliomargarita akajimensis</i> )                                                                                          | 4.00E-34  |
| 212130     | unknown                                                                            | Actinobacteria ( <i>Mycobacterium smegmatis</i> )                                                                                                | 3.00E-30  |
| 214575     | unknown                                                                            | Alphaproteobacteria ( <i>Jannaschia</i> sp.)                                                                                                     | 4.00E-26  |
| 216096     | Predicted CoA-binding protein                                                      | Firmicutes ( <i>Clostridium perfringens</i> , <i>Clostridium botulinum</i> , <i>Clostridium cellulovorans</i> )                                  | 3.00E-19  |
| 221901     | Uncharacterized conserved protein                                                  | Actinobacteria ( <i>Geodermatophilus obscurus</i> ,<br><i>Beutenbergia cavernae</i> )                                                            | 2.00E-13  |
| 223179     | Predicted integral membrane protein linked to a cation pump                        | Alphaproteobacteria ( <i>Agrobacterium tumefaciens</i> )                                                                                         | 1.00E-37  |

|        |                                                                                |                                                                                                                               |           |
|--------|--------------------------------------------------------------------------------|-------------------------------------------------------------------------------------------------------------------------------|-----------|
| 223483 | unknown                                                                        | Bacteroidetes ( <i>Paludibacter propionigenes</i> )                                                                           | 7.00E-55  |
| 223586 | Predicted esterase                                                             | Deltaproteobacteria ( <i>Haliangium ochraceum</i> )                                                                           | 2.00E-29  |
| 227462 | HemL Glutamate-1-semialdehyde aminotransferase                                 | Alphaproteobacteria ( <i>Methylobacterium radiotolerans</i> , <i>Methylobacterium nodulans</i> , <i>Methylobacterium</i> sp.) | 7.00E-36  |
| 227959 | MhpC Predicted hydrolases or acyltransferases                                  | Betaproteobacteria ( <i>Burkholderia xenovorans</i> )                                                                         | 3.00E-34  |
| 232290 | TrkA Predicted flavoprotein involved in K <sup>+</sup> transport               | Actinobacteria ( <i>Mycobacterium smegmatis</i> )                                                                             | 6.00E-43  |
| 237718 | Hfi Hydroxypyruvate isomerase                                                  | Bacteroidetes ( <i>Spirosoma linguale</i> , <i>Zumongwangia profunda</i> , <i>Maribacter</i> sp.)                             | 4.00E-80  |
| 238888 | CysC Adenylylsulfate kinase and related kinases                                | Cyanobacteria ( <i>Synechococcus</i> sp.)                                                                                     | 6.00E-90  |
| 249598 | Predicted amino acid aldolase or racemase                                      | Acidobacteria ( <i>Solibacter usitatus</i> , <i>Candidatus 'Koribacter versatilis'</i> )                                      | 1.00E-55  |
| 317236 | PyrF Orotidine-5'-phosphate decarboxylase                                      | Alphaproteobacteria ( <i>Azospirillum</i> sp.)                                                                                | 8.00E-53  |
| 368782 | Icc Predicted phosphohydrolases                                                | Gammaproteobacteria ( <i>Legionella pneumophila</i> )                                                                         | 9.00E-33  |
| 414413 | CysK Cysteine synthase                                                         | Firmicutes ( <i>Clostridium difficile</i> )                                                                                   | 4.00E-88  |
| 422943 | Era GTPase                                                                     | Bacteroidetes ( <i>Dyadobacter fermentans</i> , <i>Leadbetterella byssophila</i> )                                            | 3.00E-72  |
| 423817 | PurC Phosphoribosylaminoimidazolesuccinocarboxamide synthase                   | Gammaproteobacteria ( <i>Ferrimonas balearica</i> , <i>Vibrio cholerae</i> )                                                  | 8.00E-149 |
| 429133 | GlmS Glucosamine 6-phosphate synthetase,                                       | Bacteroidetes ( <i>Salinibacter ruber</i> , <i>Rhodothermus marinus</i> )                                                     | 4.00E-164 |
| 430491 | unknown                                                                        | Betaproteobacteria ( <i>Variovorax paradoxus</i> )                                                                            | 5.00E-50  |
| 434256 | PutA NAD-dependent aldehyde dehydrogenases                                     | Actinobacteria ( <i>Streptomyces scabiei</i> , <i>Mycobacterium abscessus</i> )                                               | 4.00E-157 |
| 438874 | MntH Mn <sup>2+</sup> and Fe <sup>2+</sup> transporters of the NRAMP family    | Bacteroidetes ( <i>Rhodothermus marinus</i> , <i>Spirosoma linguale</i> )                                                     | 2.00E-22  |
| 440614 | Protein involved in biosynthesis of mitomycin antibiotics/polyketide fumonisin | Deltaproteobacteria ( <i>Sorangium cellulosum</i> , <i>Myxococcus xanthus</i> )                                               | 8.00E-16  |
| 441379 | CaiA Acyl-CoA dehydrogenases                                                   | Alphaproteobacteria ( <i>Parvularcula bermudensis</i> )                                                                       | 8.00E-94  |
| 441750 | Rpe Pentose-5-phosphate-3-epimerase                                            | Cyanobacteria ( <i>Prochlorococcus marinus</i> )                                                                              | 5.00E-104 |
| 441988 | Short-chain alcohol dehydrogenase of unknown specificity                       | Alphaproteobacteria ( <i>Roseobacter denitrificans</i> , <i>Maricaulis maris</i> , <i>Hirschia baltica</i> )                  | 2.00E-28  |

|        |                                                                   |                                                                                                                                           |           |
|--------|-------------------------------------------------------------------|-------------------------------------------------------------------------------------------------------------------------------------------|-----------|
| 442445 | SpsE Sialic acid synthase                                         | Bacteroidetes ( <i>Croceibacter atlanticus</i> )                                                                                          | 6.00E-69  |
| 448150 | PdxK Pyridoxal/pyridoxine/pyridoxamine kinase                     | Gammaproteobacteria ( <i>Dickeya dadantii</i> )                                                                                           | 8.00E-81  |
| 450347 | AceE Pyruvate dehydrogenase complex, dehydrogenase (E1) component | Alphaproteobacteria ( <i>Sphingomonas wittichii</i> ,<br><i>Caulobacter</i> sp., <i>Bradyrhizobium</i> sp., <i>Acidiphilium cryptum</i> ) | 0         |
| 452720 | CaiA Acyl-CoA dehydrogenases                                      | Gammaproteobacteria ( <i>Pseudomonas syringae</i> ,<br><i>Pseudomonas putida</i> )                                                        | 9.00E-93  |
| 453623 | unknown                                                           | Bacteroidetes ( <i>Pedobacter heparinus</i> )                                                                                             | 5.00E-50  |
| 453687 | Predicted acetamidase/formamidase                                 | Alphaproteobacteria ( <i>Sphingomonas wittichii</i> ,<br><i>Rhizobium leguminosarum</i> )                                                 | 3.00E-46  |
| 458546 | CaiA Acyl-CoA dehydrogenases                                      | Gammaproteobacteria ( <i>Pseudomonas syringae</i> ,<br><i>Pseudomonas entomophila</i> )                                                   | 2.00E-102 |
| 459783 | Acid 1-aminocyclopropane-1-carboxylate deaminase                  | Deltaproteobacteria ( <i>Desulfovibrio desulfuricans</i> )                                                                                | 2.00E-85  |
| 461437 | WcaA Glycosyltransferases involved in cell wall biogenesis        | Deltaproteobacteria ( <i>Desulfovibrio desulfuricans</i> )                                                                                | 3.00E-28  |
| 46992  | Predicted acetamidase/formamidase                                 | Alphaproteobacteria ( <i>Rhizobium leguminosarum</i> ,<br><i>Sphingomonas wittichii</i> )                                                 | 2.00E-41  |
| 43654  | ELO, GNS1/SUR4 family                                             | Emiliana huxleyi virus 86                                                                                                                 | 1.00E-63  |
| 54601  | Dihydroceramide desaturase (Dsd1, delta-4)                        | Emiliana huxleyi virus 86                                                                                                                 | 3.00E-36  |
| 61414  | Phosphate permease                                                | Emiliana huxleyi virus 86                                                                                                                 | 3.00E-57  |
| 97888  | Lipocalin-like                                                    | Emiliana huxleyi virus 86                                                                                                                 | 5.00E-19  |
| 102590 | ERG3, Sterol desaturase                                           | Emiliana huxleyi virus 86                                                                                                                 | 7.00E-34  |
| 111551 | Hypothetical protein                                              | Emiliana huxleyi virus 86                                                                                                                 | 1.00E-11  |
| 122629 | Putative DNA cytosine methylase                                   | Enterobacteria phages                                                                                                                     | 5.00E-26  |
| 193896 | Hypothetical protein                                              | Emiliana huxleyi virus 86                                                                                                                 | 8.00E-10  |
| 193908 | Lipid phosphate phosphatase (PAP2 superfamily)                    | Emiliana huxleyi virus 86                                                                                                                 | 4.00E-15  |
| 196284 | Fatty acid desaturase (Aco1, delta-9)                             | Emiliana huxleyi virus 86                                                                                                                 | 3.00E-22  |
| 197639 | Hypothetical protein                                              | Emiliana huxleyi virus 86                                                                                                                 | 7.00E-09  |
| 200323 | Hypothetical protein                                              | Emiliana huxleyi virus 86                                                                                                                 | 5.00E-11  |
| 200862 | Dihydroceramide synthase                                          | Emiliana huxleyi virus 86                                                                                                                 | 1.00E-44  |

|        |                                                             |                                                |           |
|--------|-------------------------------------------------------------|------------------------------------------------|-----------|
| 205088 | Hypothetical protein                                        | Emiliana huxleyi virus 86                      | 5.00E-08  |
| 208320 | DNA repair/recombination protein pif1-like with HRDC domain | Emiliana huxleyi virus 86                      | 2.00E-39  |
| 210457 | ERG3, Sterol desaturase                                     | Emiliana huxleyi virus 86                      | 1.00E-54  |
| 212478 | MFS_1, Major Facilitator Superfamily                        | Emiliana huxleyi virus 86                      | 3.00E-95  |
| 215136 | Tmk, Thymidylate kinase                                     | Emiliana huxleyi virus 86                      | 5.00E-48  |
| 235604 | Glycosyl transferase family 8-like protein                  | Emiliana huxleyi virus 86                      | 3.00E-17  |
| 242737 | YqaJ viral recombinase family                               | PBCV-1, OtV5                                   | 5.00E-11  |
| 243604 | Hypothetical protein                                        | NCLDV's (Mimivirus, PBCV's, ASCV1)             | 4.00E-11  |
| 420219 | ATP-dependent DNA ligase                                    | Emiliana huxleyi virus 86                      | 1.00E-104 |
| 432191 | Sec14p-like lipid-binding domain                            | Emiliana huxleyi virus 86                      | 1.00E-12  |
| 432205 | Hypothetical protein                                        | Emiliana huxleyi virus 86                      | 1.00E-54  |
| 432901 | Serine palmitoyltransferase                                 | Emiliana huxleyi virus 86                      | 1.00E-145 |
| 432978 | Hypothetical protein                                        | Emiliana huxleyi virus 86                      | 3.00E-60  |
| 434519 | Hypothetical protein                                        | Emiliana huxleyi virus 86                      | 2.00E-32  |
| 439872 | 2OG-FeII_Oxy domain-containing protein                      | Synechococcus phage Syn9                       | 6.00E-29  |
| 440222 | Hypothetical protein                                        | Emiliana huxleyi virus 86                      | 2.00E-07  |
| 443105 | Hypothetical protein                                        | Emiliana huxleyi virus 86                      | 1.00E-78  |
| 446612 | Methyltransferase                                           | Emiliana huxleyi virus 86                      | 2.00E-22  |
| 454190 | SSL2, DNA or RNA helicases of superfamily II                | NCLDV's (Mimivirus, EsV1, OtV5, PBCV's, ASCV1) | 2.00E-23  |
| 461715 | Hypothetical protein                                        | Emiliana huxleyi virus 86                      | 2.00E-21  |
| 508420 | Formamidopyrimidine-DNA glycosylase                         | Mimivirus                                      | 4.00E-24  |

Supplementary Table 9 | Classification of the repeat content of the *E. huxleyi* genome.

| Class                                            | Category                  | Family      | coverage (bp)   | % of Genome   |
|--------------------------------------------------|---------------------------|-------------|-----------------|---------------|
| <b>Class 1</b>                                   |                           |             | <b>1456459</b>  | <b>1.115</b>  |
|                                                  | LTR RT                    |             | 992754          | 0.760         |
|                                                  |                           | Ty1/Copia   | 573139          | 0.439         |
|                                                  |                           | Ty3/Gypsy   | 5969            | 0.005         |
|                                                  |                           | DIRS        | 41333           | 0.032         |
|                                                  |                           | other*      | 372313          | 0.285         |
|                                                  | Non-LTR RT                |             |                 |               |
|                                                  |                           | LINE        | 463705          | 0.355         |
| <b>Class 2</b>                                   |                           |             | <b>3888700</b>  | <b>2.976</b>  |
|                                                  | TIR                       |             | 3848046         | 2.945         |
|                                                  |                           | Harbinger   | 46255           | 0.035         |
|                                                  |                           | hAT         | 11260           | 0.009         |
|                                                  |                           | PiggyBac    | 39231           | 0.030         |
|                                                  |                           | Sola        | 32087           | 0.025         |
|                                                  |                           | Tc1/Mariner | 70312           | 0.054         |
|                                                  |                           | MITE**      | 412678          | 0.316         |
|                                                  |                           | TIR**       | 3236223         | 2.477         |
|                                                  | Helitron                  |             |                 |               |
|                                                  |                           | Helitron    | 40654           | 0.031         |
| <b>rDNA-related***</b>                           |                           |             | <b>3751552</b>  | <b>2.871</b>  |
|                                                  | >80% rDNA coverage        |             | 65245           | 0.050         |
|                                                  | 50-80% rDNA coverage      |             | 293121          | 0.224         |
|                                                  | 20-50% rDNA coverage      |             | 3393186         | 2.597         |
| <b>NoCat***</b>                                  |                           |             | <b>40417639</b> | <b>30.935</b> |
|                                                  | >50% TR coverage          |             | 11855716        | 9.074         |
|                                                  | <50% TR coverage          |             | 28561923        | 21.861        |
| <b>Host gene***</b>                              |                           |             | <b>13226696</b> | <b>10.123</b> |
| <b>Tandem repeats and low complexity regions</b> |                           |             | 44946107        | 34.401        |
|                                                  | In dispersed repeats†     |             | 23582094        | 18.049        |
|                                                  | Not in dispersed repeats† |             | 21364013        | 16.351        |
| <b>Total ††</b>                                  |                           |             | <b>~84Mb</b>    | <b>~64%</b>   |

\* Family not clearly determined.

\*\* Only terminal inverted repeats were detected.

\*\*\* Only NoCat and rDNA-related with at least 10 copies and host genes with at least 5 copies are counted.

† Dispersed repeats comprise all above classes.

†† The total repeat content is computed by adding the subtotal of each class (first line of each class) except for "Tandem repeats and low complexity regions" where only the exclusive contribution "Not in dispersed repeats" has to be added.

**Supplementary Table 10 | Genes involved in the protection and acclimation to high light.**

| <b>Protein Description</b>                                                                                            | <b>Protein ID</b> | <b>Core/Variable</b> |
|-----------------------------------------------------------------------------------------------------------------------|-------------------|----------------------|
| <b>Light harvesting machinery and photoreceptors</b>                                                                  |                   |                      |
| UVR8 Photoreceptor                                                                                                    | 858012            | nd                   |
| Blue light cryptochrome                                                                                               | 51761             | variable             |
| Blue light cryptochrome                                                                                               | 450581            | core                 |
| Blue light cryptochrome                                                                                               | 42748             | core                 |
| Blue light cryptochrome                                                                                               | 52551             | core                 |
| Blue light cryptochrome                                                                                               | 209270            | core                 |
| Related to blue light cryptochrome                                                                                    | 118405            | variable             |
| Related to blue light cryptochrome                                                                                    | 103064            | variable             |
| Putative PAS domain sensor hybrid histidine kinase; phytochrome domain, homology to PHYA red or far red photoreceptor | 464698            | core                 |
| Similarity to blue light receptors but only has the PAS domain                                                        | 53974             | variable             |
|                                                                                                                       | 313274            | variable             |
|                                                                                                                       | 557981            | nd                   |
|                                                                                                                       | 557999            | nd                   |
|                                                                                                                       | 455463            | nd                   |
|                                                                                                                       | 557997            | bd                   |
|                                                                                                                       | 436693            | core                 |
|                                                                                                                       | 207698            | core                 |
|                                                                                                                       | 439376            | core                 |
|                                                                                                                       | 31374             | nd                   |
|                                                                                                                       | 75737             | nd                   |
| Phototropin                                                                                                           | 529487            | nd                   |
| Phytochrome-like protein similar to phytochrome                                                                       | 447461            | core                 |
| <b>Antioxidants and proteins involved in non-photochemical quenching</b>                                              |                   |                      |
| Peroxiredoxin                                                                                                         | 235642            | core                 |
|                                                                                                                       | 432312            | core                 |
| Peroxiredoxin-2E, chloroplastic                                                                                       | 470080            | nd                   |
|                                                                                                                       | 98076             | core                 |
| Thiol peroxidase                                                                                                      | 221257            | core                 |
| Violaxanthin de-epoxidase                                                                                             | 437347            | core                 |
| Violaxanthin de-epoxidase                                                                                             | 455406            | core                 |
| Zeaxanthin epoxidase                                                                                                  | 457120            | core                 |
|                                                                                                                       | 456674            | core                 |
| 11 kDa protein of photosystem II, psbZ, critical role in NPQ                                                          | 415669            | core                 |
| Alternative Oxidase                                                                                                   | 43821             | variable             |
|                                                                                                                       | 43799             | variable             |

|                                                            |        |          |
|------------------------------------------------------------|--------|----------|
| Ascorbate peroxidase                                       | 72999  | variable |
|                                                            | 69501  | core     |
|                                                            | 434150 | core     |
|                                                            | 451669 | variable |
| Glutathione peroxidase                                     | 558203 | core     |
|                                                            | 558390 | core     |
|                                                            | 632133 | core     |
|                                                            | 558200 | core     |
|                                                            | 558201 | core     |
| Catalase                                                   | 464198 | core     |
|                                                            | 350790 | core     |
| Superoxide dismutase                                       | 96386  | variable |
|                                                            | 212678 | core     |
|                                                            | 354736 | core     |
|                                                            | 364889 | core     |
| <b>Degradation, assembly and repair of PSII Components</b> |        |          |
| Photosystem II stability/assembly factor HCF136            | 461307 | core     |
| Photosystem II stability/assembly factor HCF137            | 425813 | core     |
| Photosystem II stability/assembly factor HCF138            | 253334 | variable |
| Photosystem II D1 protease                                 | 214344 | core     |
| Carboxy-terminal processing protease                       | 315400 | core     |
|                                                            | 461027 | core     |
|                                                            | 97800  | core     |
|                                                            | 243334 | nd       |
|                                                            | 436416 | core     |
| FtsH cell division protein                                 | 416950 | core     |
| FtsH                                                       | 427625 | core     |
|                                                            | 466116 | core     |
| <b>High light response proteins</b>                        |        |          |
| High light inducible protein                               | 450258 | core     |
|                                                            | 250739 | core     |

---



Supplementary Table 11| Table of 68 Light harvesting complex proteins in the *E. huxleyi* genome

| Protein ID | Allelic Variant | Annotation name | Core or Variable Genome | Group on Tree            | Proteomics Detection |
|------------|-----------------|-----------------|-------------------------|--------------------------|----------------------|
| 413829     |                 | Lhcf 2          | core                    | Red                      | Y                    |
| 439022     |                 | Lhcf 3          | core                    | Red                      | Y                    |
| 438393     | 445064          | Lhcf 4          | core                    | Not resolved             | N                    |
| 441453     |                 | Lhcf 5          | core                    | Red                      | Y                    |
| 211477     | 317615          | Lhcf 6          | core                    | Chlorophyll a/c group II | Y                    |
| 419663     |                 | Lhcf 7          | variable                | Chlorophyll a/c group I  | Y                    |
| 46861      |                 | Lhcf 8          | variable                | Chlorophyll a/c group I  | N                    |
| 231654     | 260243          | Lhcf 9          | variable                | Chlorophyll a/c group I  | N                    |
| 433058     | 434108          | Lhcf 10         | core                    | Chlorophyll a/c group I  | Y                    |
| 432202     |                 | Lhcf 11         | core                    | Chlorophyll a/c group I  | Y                    |
| 200525     | 249526          | Lhcf 12         | core                    | Chlorophyll a/c group I  | N                    |
| 66220      |                 | Lhcf 13         | core                    | Chlorophyll a/c group I  | N                    |
| 432006     |                 | Lhcf 14         | core                    | Chlorophyll a/c group I  | Y                    |
| 415729     | 446702          | Lhcf 15         | core                    | Chlorophyll a/c group I  | Y                    |
| 435472     | 372663          | Lhcf 16         | core                    | Chlorophyll a/c group I  | Y                    |
| 363095     |                 | Lhcf 17         | variable                | Chlorophyll a/c group I  | N                    |
| 443305     |                 | Lhcf 18         | nd                      | Chlorophyll a/c group I  | Y                    |
| 422150     | 77826           | Lhcf 19         | variable                | Chlorophyll a/c group I  | Y                    |
| 356694     | 362770          | Lhcf 20         | variable                | Chlorophyll a/c group I  | N                    |
| 67603      | 74777           | Lhcf 21         | core                    | Chlorophyll a/c group I  | N                    |
| 65742      |                 | Lhcf 22         | core                    | Chlorophyll a/c group I  | Y                    |
| 64682      |                 | Lhcf 23         | core                    | Chlorophyll a/c group I  | N                    |
| 438462     |                 | Lhcf 24         | core                    | Chlorophyll a/c group I  | Y                    |
| 441864     | 442651          | Lhcf 25         | core                    | Chlorophyll a/c group II | Y                    |
| 360421     | 431505          | Lhcf 26         | variable                | Chlorophyll a/c group II | Y                    |
| 435222     |                 | Lhcf 27         | core                    | Chlorophyll a/c group II | Y                    |
| 70030      |                 | Lhcf 28         | core                    | Chlorophyll a/c group II | Y                    |
| 417035     |                 | Lhcf 29         | variable                | Chlorophyll a/c group II | N                    |
| 437015     | 420179          | Lhcf 30         | variable                | Chlorophyll a/c group II | Y                    |
| 434417     |                 | Lhcf 31         | core                    | Chlorophyll a/c group II | N                    |
| 443878     |                 | Lhcf 32         | core                    | Chlorophyll a/c group II | Y                    |
| 358662     |                 | Lhcf 33         | core                    | Chlorophyll a/c group II | Y                    |
| 45662      | 467343          | Lhcf 34         | core                    | LI818                    | N                    |
| 422697     |                 | Lhcf 35         | core                    | LI818                    | Y                    |
| 69651      | 73966           | Lhcf 36         | variable                | LI818                    | N                    |
| 443721     |                 | Lhcf 36         | nd                      | LI818                    | N                    |
| 217340*    |                 | Lhcf 37         | core                    | LI818                    | Y                    |
| 430242     |                 | Lhcf 38         | variable                | LI818                    | N                    |
| 45605      | 45591           | Lhcf 39         | variable                | LI818                    | N                    |
| 436450*    |                 | Lhcf 41         | core                    | LI818                    | N                    |

|         |        |         |          |                          |   |
|---------|--------|---------|----------|--------------------------|---|
| 460117* |        | Lhcf 42 | core     | LI818                    | N |
| 416733* |        | Lhcf 43 | core     | LI818                    | N |
| 442232  |        | Lhcf 44 | core     | LhcZ                     | N |
| 203047  | 224646 | Lhcf 45 | core     | LhcZ                     | N |
| 434226  | 419743 | Lhcf 46 | core     | LhcZ                     | Y |
| 451739  |        | Lhcf 47 | core     | LhcZ                     | Y |
| 356951  |        | Lhcf 48 | core     | LhcZ                     | Y |
| 358243  |        | Lhcf 49 | core     | LhcZ                     | N |
| 414772  |        | Lhcf 50 | core     | Red                      | Y |
| 417267  |        | Lhcf 51 | core     | LI818                    | Y |
| 428685* |        | Lhcf 52 | core     | LI818                    | Y |
| 364696  |        | Lhcf 53 | core     | LhcZ                     | N |
| 76288   |        | Lhcf 54 | core     | Lhcz                     | N |
| 461003  |        | Lhcf 55 | core     | LI818                    | Y |
| 353537  |        | Lhcf 56 | core     | Chlorophyll a/c group I  | N |
| 240836  |        | Lhcf 57 | core     | Chlorophyll a/c group I  | N |
| 362550  |        | Lhcf 58 | core     | Chlorophyll a/c group I  | Y |
| 75517   |        | Lhcf 60 | variable | Chlorophyll a/c group I  | Y |
| 433847  |        | Lhcf 62 | variable | Chlorophyll a/c group II | Y |
| 312801  |        | Lhcf 63 | variable | Chlorophyll a/c group II | Y |
| 446310  |        | Lhcf 64 | core     | Chlorophyll a/c group II | Y |
| 366130  |        | Lhcf 65 | core     | Chlorophyll a/c group II | Y |
| 355940  |        | Lhcf 66 | core     | Chlorophyll a/c group II | Y |
| 353073  | 370423 | Lhcf 67 | core     | Chlorophyll a/c group II | N |
| 312310  |        | Lhcf 68 | variable | Chlorophyll a/c group II | N |
| 455747  |        | Lhcf 69 | core     | Red                      | Y |
| 358647  |        | Lhcf 70 | core     | Red                      | Y |
| 632166  |        | Lhcf 71 | nd       | Not resolved             | N |

\* denotes the detection of a CO<sub>2</sub> enhancer element

**Supplementary Table 12| Genes encoding proteins putatively involved in phosphate metabolism.**

| <b>Protein Description</b>                     | <b>No. of Paralogs</b> | <b>Protein ID</b>                   | <b>Core vs. Variable Genome</b> |        |          |
|------------------------------------------------|------------------------|-------------------------------------|---------------------------------|--------|----------|
| <b>Transporters</b>                            |                        |                                     |                                 |        |          |
| General phosphate transporter                  | 14                     | 466430                              | nd                              |        |          |
|                                                |                        | 68046                               | variable                        |        |          |
|                                                |                        | 218713                              | core                            |        |          |
|                                                |                        | 433548                              | core                            |        |          |
|                                                |                        | 200606                              | variable                        |        |          |
|                                                |                        | 438712                              | variable                        |        |          |
|                                                |                        | 438750                              | variable                        |        |          |
|                                                |                        | 456911                              | variable                        |        |          |
|                                                |                        | 463311                              | core                            |        |          |
|                                                |                        | 95576                               | core                            |        |          |
|                                                |                        | High affinity phosphate transporter |                                 | 67455  | core     |
|                                                |                        |                                     |                                 | 450989 | variable |
|                                                |                        |                                     |                                 | 61414  | core     |
|                                                |                        |                                     |                                 |        |          |
| <b>Phosphate metabolism</b>                    |                        |                                     |                                 |        |          |
| Alkaline phosphatase                           | 3                      | 369509                              | variable                        |        |          |
|                                                |                        | 433041                              | core                            |        |          |
|                                                |                        | 229451                              | core                            |        |          |
| Alkaline phosphatase domain containing protein | 2                      | 230310                              | core                            |        |          |
|                                                |                        | 457924                              | nd                              |        |          |
| 5' nucleotidase                                | 5                      | 237438                              | core                            |        |          |
| 5' nucleotidase                                |                        | 237172                              | core                            |        |          |
| 5' nucleotidase                                |                        | 251982                              | core                            |        |          |
| 5' nucleotidase                                |                        | 111381                              | variable                        |        |          |
| 5' nucleotidase                                |                        | 111972                              | core                            |        |          |
| Cyclic GMP phosphodiesterase                   | 1                      | 108787                              | variable                        |        |          |
| Purple acid phosphatase-like protein/Phytase   | 4                      | 62631                               | core                            |        |          |
|                                                |                        | 462501                              | nd                              |        |          |
|                                                |                        | 62875/78521                         | core                            |        |          |
|                                                |                        | 451170/67476                        | nd                              |        |          |
|                                                |                        |                                     |                                 |        |          |
| Inorganic pyrophosphatase                      | 3                      | 44801                               | core                            |        |          |
|                                                |                        | 437335                              | core                            |        |          |
|                                                |                        | 439540/447001                       | core                            |        |          |
|                                                |                        |                                     |                                 |        |          |
| Acidocalcisomal pyrophosphatase                | 2                      | 415968                              | core                            |        |          |
|                                                |                        | 436192                              | core                            |        |          |
| Nudix hydrolase                                | 4                      | 45305                               | nd                              |        |          |

|       |      |
|-------|------|
| 45054 | core |
| 45000 | core |
| 50111 | core |

### Evidence of Phosphonate Metabolism

|                                                          |   |        |          |
|----------------------------------------------------------|---|--------|----------|
| HAD superfamily hydrolase                                | 1 | 65222  | core     |
| Haloacid dehalogenase-like hydrolase                     | 2 | 428568 | nd       |
|                                                          |   | 428161 | core     |
| Carboxyvinyl-carboxyphosphonate phosphorylmutase         | 3 | 47077  | core     |
|                                                          |   | 254202 | variable |
|                                                          |   | 238585 | core     |
| ABC transporter with homology to phosphonate transporter | 4 | 427008 | core     |
|                                                          |   | 427164 | core     |
|                                                          |   | 110965 | core     |
|                                                          |   | 417116 | core     |

### Regulation

|                                  |   |        |          |
|----------------------------------|---|--------|----------|
| Two component response regulator | 2 | 69109  | nd       |
|                                  |   | 67954  | core     |
| Homeobox transcription factor    | 2 | 434760 | core     |
|                                  |   | 445626 | nd       |
| Cyclin dependent kinase type C   | 1 | 436308 | core     |
| Protein kinase                   | 3 | 444655 | nd       |
|                                  |   | 452712 | core     |
|                                  |   | 313453 | variable |

### Phospholipid Replacement

|                                       |   |        |      |
|---------------------------------------|---|--------|------|
| Sulfolipid biosynthesis protein       | 1 | 466230 | core |
| Sulfolipid synthetase                 | 1 | 97678  | core |
| Phospholipid/glycerol acyltransferase | 2 | 211471 | core |
|                                       |   | 75696  | nd   |
| N-acetyltransferase 12 isoform        | 2 | 105120 | core |
|                                       |   | 240186 | nd   |

**Supplementary Table 13| Genes encoding proteins putatively involved in nitrogen metabolism.**

| <b>Name</b>                          | <b>Protein ID</b>  | <b>Core or Variable Genome</b> |
|--------------------------------------|--------------------|--------------------------------|
| <b>Nitrogen Metabolism</b>           |                    |                                |
| Glutamate synthase                   | 212450             | core                           |
| Glutamate synthase                   | 467437             | core                           |
| Glutamate synthase                   | 449382             | nd                             |
| Glutamate synthase                   | 225692             | core                           |
| Glutamate synthase                   | 469498             | nd                             |
| Glutamine synthetase                 | 470023             | core                           |
| Glutamine synthetase                 | 437187             | core                           |
| Glutamine synthetase                 | 110084             | nd                             |
| Glutamine synthetase                 | 52323              | core                           |
| Glutamine synthetase                 | 69253              | core                           |
| Glutamine dehydrogenase              | 433762             | core                           |
| Glutamine dehydrogenase              | 69206              | core                           |
| <b>Inorganic Nitrogen Metabolism</b> |                    |                                |
| Nitrogen fixation protein            | 254468             | core                           |
| Nitrogen fixation protein            | 197151             | core                           |
| Nitrite reductase                    | 428968             | core                           |
| Copper nitrite reductase             | 69470/70548/70565  | variable                       |
| Nitrite transporter                  | 232402             | nd                             |
| Nitrite transporter                  | 231096             | core                           |
| Nitrite transporter                  | 439254             | core                           |
| Nitrite transporter                  | 64600              | core                           |
| Nitrite transporter                  | 373579             | core                           |
| High affinity nitrate transporter    | 62811              | core                           |
| High affinity nitrate transporter    | 440685             | core                           |
| Nitrate transporter                  | 361445             | core                           |
| Nitrate transporter                  | 195544             | core                           |
| Nitrate transporter                  | 460408             | variable                       |
| Nitrate transporter                  | 73160              | core                           |
| Nitrate transporter                  | 115184             | core                           |
| Nitrate transporter                  | 311732             | variable                       |
| Nitric oxide synthase                | 550420             | nd                             |
| flavo-hemoglobin                     | 522194             | nd                             |
| <b>Cyanate</b>                       |                    |                                |
| Cyanate lyase                        | 73978              | nd                             |
| Cyanate lyase                        | 69646              | core                           |
| Cyanate transporter                  | ACCT9561-J03.xld-F | nd                             |
| Cyanate transporter                  | AWCG1205-H03.xld-F | nd                             |
| Nitriliase                           | 198908             | core                           |
| Nitriliase                           | 456340             | core                           |
| Nitriliase                           | 454646             | core                           |
| Nitriliase                           | 210750             | core                           |
| Nitriliase                           | 462146             | core                           |

|                                        |        |          |
|----------------------------------------|--------|----------|
| Nitriliase                             | 415168 | variable |
| <b>Urea</b>                            |        |          |
| Urea transporter                       | 194219 | core     |
| Urea transporter                       | 440179 | core     |
| Urea transporter                       | 460978 | core     |
| Urea transporter                       | 68140  | variable |
| Urea transporter                       | 225018 | variable |
| Urea transporter                       | 217311 | nd       |
| Arginase                               | 573947 | nd       |
| Urease                                 | 631885 | nd       |
| Carbamoyl phosphate synthetase-III     | 422007 | core     |
| Carbamoyl phosphate synthetase-II      | 463837 | core     |
| Ornithine transcarbamylase             | 204139 | core     |
| Ornithine transcarbamylase             | 236460 | nd       |
| Argininosuccinic acid synthetase       | 528272 | nd       |
| Argininosuccinic acid synthetase       | 124858 | core     |
| Argininosuccinate lyase                | 458298 | core     |
| Argininosuccinate lyase                | 465437 | core     |
| Argininosuccinate lyase                | 552739 | nd       |
| Ammonium transporter                   | 212609 | nd       |
| Ammonium transporter                   | 217537 | nd       |
| Ammonium transporter                   | 70117  | variable |
| Ammonium transporter                   | 62984  | nd       |
| Ammonium transporter                   | 464017 | core     |
| Ammonium transporter                   | 415646 | variable |
| Ammonium transporter                   | 456888 | variable |
| Ammonium transporter                   | 433750 | core     |
| Ammonium transporter                   | 74037  | core     |
| Ammonium transporter                   | 471321 | variable |
| Ammonium transporter                   | 201096 | variable |
| Ammonium transporter                   | 521917 | nd       |
| Ammonium transporter                   | 452779 | core     |
| Ammonium transporter                   | 61319  | core     |
| Ammonium transporter                   | 433338 | core     |
| Ammonium transporter                   | 451136 | core     |
| Ammonium transporter                   | 193894 | variable |
| Ammonium transporter                   | 65124  | core     |
| Ammonium transporter                   | 463302 | variable |
| Ammonium transporter                   | 122984 | variable |
| <b>Other</b>                           |        |          |
| Phenylalanine/Histidine ammonia lyase  | 69043  | variable |
| Glutaminase                            | 68199  | core     |
| Glutaminase                            | 101092 | core     |
| Glutaminase                            | 470892 | nd       |
| Glutaminase                            | 64305  | core     |
| Hypoxanthine phosphoribosyltransferase | 428604 | core     |
| Polyamine transporter                  | 558131 | nd       |
| Polyamine transporter                  | 558095 | nd       |
| Polyamine transporter                  | 446672 | nd       |

|                                    |        |          |
|------------------------------------|--------|----------|
| Polyamine transporter              | 558152 | nd       |
| Polyamine transporter              | 240775 | variable |
| Polyamine transporter              | 539234 | nd       |
| Polyamine transporter              | 108831 | nd       |
| Polyamine transporter              | 543743 | nd       |
| Polyamine transporter              | 558060 | nd       |
| Polyamine transporter              | 558138 | nd       |
| Polyamine transporter              | 558140 | nd       |
| Polyamine transporter              | 454057 | core     |
| Polyamine transporter              | 196046 | variable |
| Polyamine transporter              | 77006  | nd       |
| Polyamine transporter              | 204281 | core     |
| Polyamine transporter              | 457373 | variable |
| Polyamine transporter              | 70520  | core     |
| Polyamine transporter              | 558156 | nd       |
| Polyamine transporter              | 558130 | nd       |
| Polyamine transporter              | 201292 | core     |
| Polyamine transporter              | 108941 | core     |
| Polyamine transporter              | 438821 | core     |
| Polyamine transporter              | 558157 | nd       |
| Polyamine transporter              | 73488  | core     |
| Dipeptidase plasmid membrane bound | 247883 | variable |
| Dipeptidase plasmid membrane bound | 466525 | core     |
| Dipeptidase plasmid membrane bound | 467505 | nd       |
| Dipeptidase plasmid membrane bound | 227593 | nd       |
| Amine oxidase                      | 464657 | core     |
| Amine oxidase                      | 201294 | core     |
| Amine oxidase copper               | 111175 | core     |
| Amine oxidase copper               | 205572 | core     |
| Amine oxidase copper               | 220023 | core     |
| Amine oxidase copper               | 197391 | variable |
| D-amino acid oxidase               | 210589 | core     |
| L-amino acid oxidase               | 120029 | variable |
| FAD amine oxidase                  | 244346 | variable |
| FAD amine oxidase                  | 112568 | variable |
| FAD amine oxidase                  | 116825 | core     |
| Polyamine oxidase                  | 352602 | core     |
| Chitinase                          | 117626 | core     |
| Chitinase                          | 65231  | core     |
| Chitinase                          | 453682 | core     |
| Chitinase                          | 353656 | variable |
| Chitinase                          | 429900 | core     |
| Chitinase                          | 469375 | nd       |
| Chitinase                          | 417127 | core     |
| Chitinase                          | 225160 | variable |
| Amidase                            | 227739 | variable |
| Amidase                            | 451302 | variable |
| Amidase                            | 456188 | variable |
| Amidase                            | 109981 | variable |

|                                 |                              |          |
|---------------------------------|------------------------------|----------|
| Amidase                         | 102453                       | variable |
| Acetamidase/Formamidase         | 219043                       | variable |
| Acetamidase/Formamidase         | 219044                       | variable |
| Acetamidase/Formamidase         | 453687                       | core     |
| Acetamidase/Formamidase         | 444643                       | core     |
| Acetamidase/Formamidase         | 245832                       | variable |
| Acetamidase/Formamidase         | 469992                       | variable |
| Acetamidase/Formamidase         | 215750                       | variable |
| Acetamidase/Formamidase         | 452038                       | variable |
| Acetamidase/Formamidase         | 440936                       | core     |
| Nitrile hydratase beta subunit  | 56930                        | variable |
| Nitrile hydratase alpha subunit | 107811                       | nd       |
| Nitrile hydratase alpha subunit | 106673                       | nd       |
| Nitric oxide reductase          | Present in unassembled reads |          |

---



**Supplementary Table 14| Genes encoding putative selenoproteins.**

| <b>Selenoprotein</b>                                  | <b>Gene name</b> | <b>Protein ID</b> | <b>Allelic Variant</b> |
|-------------------------------------------------------|------------------|-------------------|------------------------|
| Dithiodisulfide oxidoreductase                        | DSBA1            | 558350            | 558351                 |
| Dithiodisulfide oxidoreductase                        | DSBA2            | 558352            |                        |
| Dithiodisulfide oxidoreductase                        | DSBA3            | 632129            | 632130                 |
| Dithiodisulfide oxidoreductase                        | DSBA4            | 632131            |                        |
| Dithiodisulfide oxidoreductase                        | DSBA5            | 632132            |                        |
| Gamma interferon inducible lysosomal thiol reductase  | GILT1            | 632140            |                        |
| Gamma interferon inducible lysosomal thiol reductase  | GILT2            | 632141            |                        |
| Glutathione peroxidase                                | GPX1             | 558200            |                        |
| Glutathione peroxidase                                | GPX2             | 558201            |                        |
| Phospholipid hydroperoxide glutathione peroxidase     | PHGPX3           | 558202            | 558204                 |
| Glutathione peroxidase                                | GPX5             | 558203            | 558205                 |
| Glutathione peroxidase                                | GPX6             | 558390            |                        |
| Glutathione peroxidase                                | GPX7             | 632133            | 632134                 |
| Iodothyronine deiodinase                              | DIO1             | 558396            |                        |
| Iodothyronine deiodinase                              | DIO2             | 632124            | 632125                 |
| Iodothyronine deiodinase                              | DIO3             | 632126            | 632127                 |
| Iodothyronine deiodinase                              | DIO4             | 632128            |                        |
| Iron-sulfur oxidoreductase                            | GLPC1            | 632148            |                        |
| Membrane selenoprotein                                | MSP1             | 632149            |                        |
| Methylated-DNA-[protein]-cysteine-S-methyltransferase | MGMT1            | 558389            |                        |
| Peptide methionine-S-sulfoxide reductase              | MSRA1            | 558199            |                        |
| Peptide methionine-S-sulfoxide reductase              | MSRA9            | 558301            |                        |
| Protein disulfide isomerase                           | PDI1             | 558386            | 558387                 |
| Protein disulfide isomerase                           | PDI2             | 632135            | 632136                 |
| Protein disulfide isomerase                           | PDI3             | 632139            |                        |
| Selenoprotein 15                                      | SEL15            | 558397            | 558398                 |
| Selenoprotein H                                       | SELH1            | 558360            |                        |
| Selenoprotein H                                       | SELH2            | 632122            | 632123                 |
| Selenoprotein M                                       | SELM1            | 632113            |                        |
| Selenoprotein M                                       | SELM2            | 632114            |                        |
| Selenoprotein M                                       | SELM3            | 632115            |                        |
| Selenoprotein M                                       | SELM4            | 632117            | 632116                 |
| Selenoprotein M                                       | SELM5            | 632118            | 632119                 |
| Selenoprotein M                                       | SELM6            | 632120            | 632121                 |
| Selenoprotein O                                       | SELO1            | 558338            | 558339                 |
| Selenoprotein O                                       | SELO3            | 558340            |                        |
| Selenoprotein O                                       | SELO4            | 558343            |                        |
| Selenoprotein O                                       | SELO2            | 558344            |                        |
| Selenoprotein T                                       | SELT1            | 558358            | 558359                 |
| Selenoprotein T                                       | SELT2            | 632105            |                        |

|                                     |       |        |        |
|-------------------------------------|-------|--------|--------|
| Selenoprotein U                     | SELU1 | 558353 |        |
| Selenoprotein U                     | SELU2 | 632109 | 632111 |
| Selenoprotein U                     | SELU3 | 632112 |        |
| Selenoprotein W                     | SELW1 | 632107 | 632108 |
| Thiol protein                       | THIO1 | 632145 | 632144 |
| Thiol protein                       | THIO2 | 632146 |        |
| Thiol protein                       | THIO3 | 632147 |        |
| Thiol:disulfide interchange protein | TDIP1 | 632142 | 632143 |
| Thioredoxin reductase               | TXR1  | 417208 |        |

---

**Supplementary Table 15| Genes encoding proteins involved in the metabolism or synthesis of vitamins.**

| Vitamin Name                                                                      | PID    | Core/Variable |
|-----------------------------------------------------------------------------------|--------|---------------|
| <b>Pro-Vitamin A</b>                                                              |        |               |
| IPP/DMAPP Isomerase                                                               | 359474 | core          |
| GGPP synthase                                                                     | 470946 | core          |
|                                                                                   | 465220 | core          |
| Phytoene synthase                                                                 | 68943  | core          |
| Phytoene desaturase                                                               | 74977  | nd            |
|                                                                                   | 430592 | core          |
| Carotene desaturase                                                               | 421941 | core          |
|                                                                                   |        |               |
| Lycopene $\beta$ and $\epsilon$ -cyclase                                          | 42521  | core          |
|                                                                                   | 448849 | core          |
| <b>B<sub>1</sub> Synthesis</b>                                                    |        |               |
| Dinucleotide-utilizing enzyme involved in molybdopterin and thiamine biosynthesis | 102319 | variable      |
|                                                                                   | 68584  | core          |
|                                                                                   | 102870 | core          |
| Thiamine monophosphate synthase                                                   | 55659  | core          |
|                                                                                   | 102278 | core          |
|                                                                                   | 53832  | variable      |
| Thiamine pyrophosphokinase                                                        | 56054  | core          |
|                                                                                   | 72909  | nd            |
| Doxyxylulose-5-phosphate synthase                                                 | 440786 | nd            |
|                                                                                   |        |               |
| ABC-Type thiamine transporter                                                     | 50800  | core          |
|                                                                                   | 418765 | nd            |
|                                                                                   | 50947  | core          |
| <b>B<sub>1</sub> Related (thiamine)</b>                                           |        |               |
| Thiamine monophosphate synthase                                                   | 102278 | core          |
| Thiamine triphosphatase                                                           | 453444 | core          |
|                                                                                   | 458212 | nd            |
| Thiamine pyrophosphate enzyme-like TPP binding protein                            | 199879 | core          |
|                                                                                   | 312361 | variable      |
| Acetohydroxyacid synthase                                                         | 453895 | core          |
|                                                                                   | 233263 | nd            |
|                                                                                   | 118308 | nd            |
|                                                                                   | 113095 | variable      |
|                                                                                   | 107052 | core          |
| Plastid transketolase                                                             | 437959 | core          |

|                                                                                              |        |          |
|----------------------------------------------------------------------------------------------|--------|----------|
| Transketolase                                                                                | 420320 | core     |
|                                                                                              | 450347 | core     |
|                                                                                              | 423965 | core     |
| <b>B<sub>2</sub> (Riboflavin)</b>                                                            |        |          |
| GTP cyclohydrolase II                                                                        | 46070  | core     |
| 3,4-dihydroxy-2-butanone 4-phosphate synthase                                                | 240699 | nd       |
| Bifunctional 2,5-diamino-6-ribosylamino-4 (3H)-pyrimidinone 5'-phosphate deaminase/reductase | 457738 | nd       |
|                                                                                              | 457487 | core     |
| 6,7-dimethyl-8-ribityllumazine synthase                                                      | 434395 | core     |
| Riboflavin synthase                                                                          | 430591 | core     |
| Riboflavin kinase                                                                            | 434713 | core     |
|                                                                                              | 214135 | core     |
|                                                                                              | 237657 | nd       |
|                                                                                              | 243687 | nd       |
| FAD synthetase                                                                               | 101902 | core     |
| <b>B<sub>3</sub> (Niacin)</b>                                                                |        |          |
| Aspartate oxidase                                                                            | 450514 | core     |
| Quinolinate synthase                                                                         |        |          |
| Quinolinate phosphoribosyltransferase                                                        | 99818  | core     |
| <b>B<sub>5</sub> (Pantothenic acid)</b>                                                      |        |          |
| Bifunctional ketopantoate hydroxymethyltransferase/pantothenate synthase                     | 439738 | variable |
| Ketopantoate reductase                                                                       | 364279 | nd       |
| <b>B<sub>6</sub> Salvage Pathway (pyridoxal related compounds)</b>                           |        |          |
| Pyridoxal biosynthesis protein                                                               | 470721 | nd       |
|                                                                                              | 426056 | core     |
|                                                                                              | 427499 | core     |
| Probable glutamine aminotransferase                                                          | 222283 | core     |
|                                                                                              | 123272 | variable |
| Pyridoxal kinase                                                                             | 448150 | core     |
|                                                                                              | 44317  | core     |
|                                                                                              | 45753  | variable |
| Pyridoxal reductase                                                                          | 417225 | core     |
| <b>B<sub>7</sub> Metabolism (Biotin)</b>                                                     |        |          |
| 8-amino-7-oxononanoate synthase                                                              | 72721  | core     |
|                                                                                              | 62552  | core     |
|                                                                                              | 250705 | variable |

|                                                                                           |        |          |
|-------------------------------------------------------------------------------------------|--------|----------|
| Bifunctional diethiothiotin synthetase/7,8-diamino-pelargonic acid aminotransferase       | 456336 | core     |
| Biotin synthase                                                                           | 423761 | variable |
| DAPA                                                                                      | 456336 | core     |
| <b>B<sub>9</sub> (folic Acid)</b>                                                         |        |          |
| GTP cyclohydrolase I                                                                      | 73174  | core     |
| 5-aminoimidazole ribonucleotide carboxylase                                               | 421581 | core     |
| 5-phosphoribosyl-1- pyrophosphate synthase/6-hydroxymethyldihydropterin pyrophosphokinase | 457751 | nd       |
|                                                                                           | 43668  | variable |
|                                                                                           | 43644  | core     |
| 4-amino-4-deoxychorismate synthase                                                        | 313952 | core     |
|                                                                                           | 78576  | nd       |
| Dihydrofolate reductase/synthase                                                          | 451981 | core     |
| Dihydroneopterin (DHN) aldolase                                                           | 372344 | nd       |
|                                                                                           | 351975 | core     |
| Aminodeoxychorismate lyase                                                                | 110960 | core     |
| Dihydropteroate synthase                                                                  | 235458 | variable |
|                                                                                           | 234285 | core     |
|                                                                                           | 215177 | variable |
| Folypolyglutamate synthase                                                                | 471063 | nd       |
|                                                                                           | 467825 | core     |
| UDP-glucose-p-aminobenzoate glycosyltransferase                                           | 226129 | core     |
|                                                                                           | 233893 | variable |
| $\gamma$ -glutamylhydrolase                                                               | 68526  | core     |
|                                                                                           | 78425  | nd       |
| <b>B<sub>12</sub> Related (Cobalamin)</b>                                                 |        |          |
| S-adenosyl homocysteine hydrolase                                                         | 441258 | core     |
|                                                                                           | 440113 | core     |
|                                                                                           | 440119 | core     |
| Glycine hydroxymethyltransferase                                                          | 433725 | core     |
|                                                                                           | 422976 | core     |
| S-adenosylmethioine synthetase                                                            | 462645 | core     |
|                                                                                           | 198673 | core     |
| Homocystein S-methyltransferase                                                           | 423073 | core     |
|                                                                                           | 463726 | core     |
| Methylmalonyl-CoA mutase                                                                  | 417351 | core     |
| Methylenetetrahydrofolate reductase                                                       | 437840 | core     |
|                                                                                           | 471108 | core     |
| <b>B<sub>12</sub> Synthesis/Acquisition</b>                                               |        |          |
| Uroporphyrin-III C/tetrapyrrole (Corrin/Porphyrin) methyltransferase                      | 213726 | core     |
|                                                                                           | 45130  | core     |

|                                                     |        |          |
|-----------------------------------------------------|--------|----------|
|                                                     | 55801  | variable |
| Cobyrinic acid a,c-diamide synthase                 | 251565 | variable |
|                                                     | 437870 | core     |
| Cobalamin adensyltransferase                        | 350873 | core     |
|                                                     | 366962 | nd       |
| Cobalamin biosynthesis protein CobN and Mg=chelatas | 309350 | core     |
|                                                     | 317426 | core     |
| Cobalamin-5-phosphate synthase                      | 95466  | core     |
|                                                     |        |          |
| Nicotinate-nucleotide-dimethylbenzimidazole         | 210261 | core     |
|                                                     | 241304 | nd       |
|                                                     | 242675 | nd       |
| Cobalamin synthesis protein                         | 417487 | core     |
|                                                     | 75934  | nd       |
|                                                     | 122283 | core     |
|                                                     | 73828  | core     |
|                                                     | 61544  | core     |
|                                                     | 443176 | core     |
|                                                     | 439522 | core     |
|                                                     | 61289  | core     |
|                                                     | 461078 | core     |
|                                                     | 456070 | nd       |
|                                                     | 465373 | core     |
|                                                     | 430429 | core     |
|                                                     | 52778  | core     |
|                                                     | 60847  | nd       |
|                                                     | 74134  | nd       |
|                                                     | 119467 | variable |
|                                                     | 70806  | core     |
|                                                     | 43607  | core     |
|                                                     | 96729  | variable |
|                                                     | 438497 | core     |
|                                                     | 456427 | core     |
|                                                     | 41835  | core     |
|                                                     | 102634 | core     |
|                                                     | 43480  | variable |
|                                                     | 461078 | core     |
|                                                     | 61544  | core     |
|                                                     |        |          |
| <b>Vitamin E Tocopherol Synthesis</b>               |        |          |
| Homogentisate Phytol transferase (VTE2)             | 56139  | nd       |

|                                                   |        |          |
|---------------------------------------------------|--------|----------|
|                                                   | 55059  | core     |
|                                                   | 115547 | nd       |
| Solanyl synthase                                  |        |          |
| Phytol kinase                                     | 436338 | core     |
|                                                   | 99736  | core     |
| Tocopherol cyclase (VTE1)                         | 54133  | core     |
|                                                   | 98577  | core     |
|                                                   | 237937 | nd       |
| Tocopherol O-methyltransferase                    | 60986  | core     |
|                                                   | 98396  | core     |
| MPBQ/MSBQ methyltransferase                       | 221641 | core     |
| Phytyltransferase                                 | 115547 | nd       |
|                                                   | 95285  | core     |
|                                                   | 56139  | nd       |
|                                                   | 55059  | variable |
| <b>C (Ascorbate)</b>                              |        |          |
| GTP-mannose pyrophosphorylase                     | 445627 | nd       |
|                                                   | 434761 | core     |
| GTP Mannose-3,5-epimerase/phosphmannose isomerase | 52642  | core     |
|                                                   | 52327  | nd       |
| L-galactose guanyltransferase                     |        |          |
| L-galactose-1-P phosphatase                       | 66633  | core     |
|                                                   | 310251 | core     |
| L-galactose dehydrogenase                         | 68207  | core     |
|                                                   | 462242 | core     |
| L-galactono-1, 4-lactone dehydrogenase            | 70809  | core     |
|                                                   | 118863 | nd       |
| <b>D (calciferol)</b>                             |        |          |
| D3 24-hydroxylase                                 | 217091 | variable |
| 25-hydroxyvitamin D-1 alpha hydrolase             | 467235 | variable |
| Calcidiol 1- monooxygenase                        | 454070 | variable |
|                                                   | 458776 | core     |
|                                                   | 452377 | core     |
|                                                   | 72799  | variable |
|                                                   | 470128 | core     |
|                                                   | 111143 | core     |
|                                                   | 97603  | variable |
| <b>E (tocopherols)</b>                            |        |          |
| Homogentisate geranylgeranyl transferase          | 115547 | nd       |
|                                                   | 95285  | core     |

|                                               |        |          |
|-----------------------------------------------|--------|----------|
|                                               | 56139  | nd       |
|                                               | 55059  | variable |
| MPBQ/MSBQ methyltransferase                   | 221641 | core     |
|                                               | 98396  | core     |
| Homogentisate solanyltransferase transferase  | 95285  | core     |
|                                               | 115547 | variable |
|                                               | 56139  | nd       |
|                                               | 55059  | core     |
| Tocopherol cyclase                            | 54133  | core     |
|                                               | 98577  | core     |
|                                               | 237937 | nd       |
| Chorismate mutase                             | 470315 | core     |
| Hydroxyphenylpyruvate (HPP) dioxygenase       | 452207 | core     |
|                                               | 470913 | nd       |
| Tocopherol methyltransferase                  | 60986  | core     |
| <b>K (Phylloquinone)</b>                      |        |          |
| Isochorismate synthase                        | 448402 | core     |
| PHYLLO                                        | 96767  | core     |
| 1,4-dihydroxy-2-naphthoate phytyl transferase |        |          |
| O-succinylbenzoate CoA ligase                 |        |          |
| 1,4-dihydroxy-2-naphthoate CoA synthase       |        |          |
| 1,4-dihydroxy-2-naphthoate CoA thioesterase   |        |          |
| 1,4-dihydroxy-2-naphthoate phytyltransferase  |        |          |
| Demethylphylloquinone methyltransferase       | 75975  | core     |
|                                               | 74671  | core     |
| Vitamin K epoxide reductase                   | 361809 | core     |
